# Supplementary material for: DFT Study of Methylene Blue Adsorption on ZnTiO3 and TiO2 Surfaces (101)
Source: MDPI journal article supplement (doi:10.3390/molecules26133780), 2021-06-22
Supplement: s1 [file s1]

# DFT Study of Methylene Blue Adsorption on ZnTiO<sub>3</sub> and TiO<sub>2</sub> Surfaces (101)

Ximena Jaramillo-Fierro <sup>1,2,\*</sup>, Luis Fernando Capa <sup>3</sup>, Francesc Medina <sup>4</sup> and Silvia González <sup>2</sup>

<sup>1</sup> Departamento d'Enginyeria Química, Universitat Rovira i Virgili, Av Països Catalans, 2643007 Tarragona, Spain

<sup>2</sup> Departamento de Química y Ciencias Exactas, Universidad Técnica Particular de Loja, San Cayetano Alto, Loja 1101608, Ecuador; sgonzalez@utpl.edu.ec

<sup>3</sup> Maestría en Química Aplicada, Universidad Técnica Particular de Loja, San Cayetano Alto, Loja 1101608, Ecuador; lfcapa@utpl.edu.ec

<sup>4</sup> Departamento d'Enginyeria Química, Universitat Rovira i Virgili, Av Països Catalans, 2643007 Tarragona, Spain; francesc.medina@urv.cat

\* Correspondence: xvjaramillo@utpl.edu.ec; Tel.: +593-7-3701444

**Abstract:** The search for alternative materials with high dye adsorption capacity, such as methylene blue (MB), remains the focus of current studies. This computational study focuses on oxides ZnTiO<sub>3</sub> and TiO<sub>2</sub> (anatase phase) and on their adsorptive properties. Computational calculations based on DFT methods were performed using the Viena Ab initio Simulation Package (VASP) code to study the electronic properties of these oxides. The bandgap energy values calculated by the Hubbard *U* (GGA+*U*) method for ZnTiO<sub>3</sub> and TiO<sub>2</sub> were 3.17 and 3.21 eV, respectively, which are consistent with the experimental data. The most favorable orientation of the MB adsorbed on the surface (101) of both oxides is semi-perpendicular. Stronger adsorption was observed on the ZnTiO<sub>3</sub> surface (−282.05 kJ/mol) than on TiO<sub>2</sub> (−10.95 kJ/mol). Anchoring of the MB molecule on both surfaces was carried out by means of two protons in a bidentate chelating (BC) adsorption model. The high adsorption energy of the MB dye on the ZnTiO<sub>3</sub> surface shows the potential value of using this mixed oxide as a dye adsorbent for several technological and environmental applications.

**Keywords:** DFT; ZnTiO<sub>3</sub>; TiO<sub>2</sub>; methylene blue; adsorption

**Citation:** Jaramillo-Fierro, X.; Capa, L.F.; Medina, F.; González, S. DFT Study of Methylene Blue Adsorption on ZnTiO<sub>3</sub> and TiO<sub>2</sub> Surfaces (101). *Molecules* **2021**, *26*, 3780. <https://doi.org/10.3390/molecules26133780>

Academic Editor: Monika Wawrzekiewicz

Received: 25 May 2021

Accepted: 19 June 2021

Published: 22 June 2021

**Publisher's Note:** MDPI stays neutral with regard to jurisdictional claims in published maps and institutional affiliations.

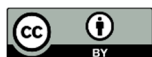

**Copyright:** © 2021 by the authors. Licensee MDPI, Basel, Switzerland. This article is an open access article distributed under the terms and conditions of the Creative Commons Attribution (CC BY) license (<http://creativecommons.org/licenses/by/4.0/>).

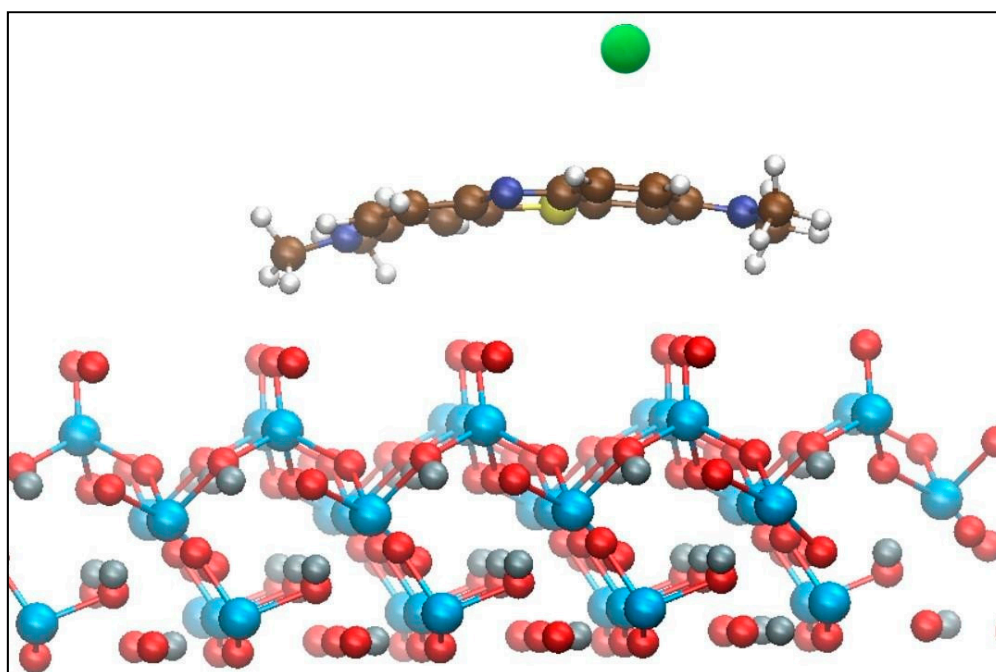

Figure S1. Aromatic ring of MB bent slightly on the ZnTiO<sub>3</sub> surface (101)

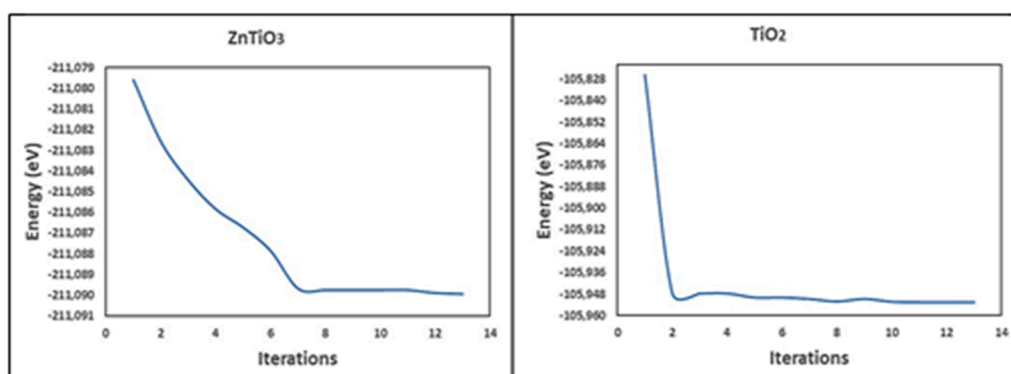

Figure S2. Optimization energies of (a) ZnTiO<sub>3</sub> and (b) TiO<sub>2</sub>.

Table S1. Coordinates of the optimized ZnTiO<sub>3</sub> and TiO<sub>2</sub> structures.

| ZnTiO <sub>3</sub>  | Element | Coordinates        |                    |                    |
|---------------------|---------|--------------------|--------------------|--------------------|
|                     |         | X                  | Y                  | Z                  |
| a = 5.14797         | O 1     | 0.0436517776555294 | 0.3434519311655431 | 0.0618327064818351 |
| b = 5.14797         | O 2     | 0.6565480388344616 | 0.7001998274899882 | 0.0618327064818351 |
| c = 13.93750        | O 3     | 0.2998001425100092 | 0.9563482113444732 | 0.0618327064818351 |
| $\alpha$ = 90.0000  | O 4     | 0.6565480388344616 | 0.9563482113444732 | 0.5618327214818327 |
| $\beta$ = 90.0000   | O 5     | 0.2998001425100092 | 0.3434519311655431 | 0.5618327214818327 |
| $\gamma$ = 120.0000 | O 6     | 0.0436517776555294 | 0.7001998274899882 | 0.5618327214818327 |
|                     | O 7     | 0.7103184156555318 | 0.6767852741655427 | 0.3951660354818335 |
|                     | O 8     | 0.3232147258344573 | 0.0335331784899886 | 0.3951660354818335 |
|                     | O 9     | 0.9664667985100132 | 0.2896815543444728 | 0.3951660354818335 |
|                     | O 10    | 0.3232147258344573 | 0.2896815543444728 | 0.8951660354818335 |
|                     | O 11    | 0.9664667985100132 | 0.6767852741655427 | 0.8951660354818335 |
|                     | O 12    | 0.7103184156555318 | 0.0335331784899886 | 0.8951660354818335 |
|                     | O 13    | 0.3769851026555275 | 0.0101185981655372 | 0.7284993484818306 |
|                     | O 14    | 0.9898814118344565 | 0.3668665144899912 | 0.7284993484818306 |

|                    |                |                     |                     |                    |
|--------------------|----------------|---------------------|---------------------|--------------------|
|                    | O 15           | 0.6331334855100089  | 0.6230148973444725  | 0.7284993484818306 |
|                    | O 16           | 0.9898814118344565  | 0.6230148973444725  | 0.2284993784818331 |
|                    | O 17           | 0.6331334855100089  | 0.0101185981655372  | 0.2284993784818331 |
|                    | O 18           | 0.3769851026555275  | 0.3668665144899912  | 0.2284993784818331 |
|                    | Zn 1           | 0.0000000000000000  | -0.0000000000000000 | 0.2790581887331681 |
|                    | Zn 2           | 0.0000000000000000  | -0.0000000000000000 | 0.7790581887331682 |
|                    | Zn 3           | 0.6666666870000029  | 0.3333333429999996  | 0.6123915017331654 |
|                    | Zn 4           | 0.6666666870000029  | 0.3333333429999996  | 0.1123915247331636 |
|                    | Zn 5           | 0.3333333429999996  | 0.6666666870000029  | 0.9457248747331675 |
|                    | Zn 6           | 0.3333333429999996  | 0.6666666870000029  | 0.4457248457331685 |
|                    | Ti 1           | 0.0000000000000000  | -0.0000000000000000 | 0.9988437118213425 |
|                    | Ti 2           | 0.0000000000000000  | -0.0000000000000000 | 0.4988437118213426 |
|                    | Ti 3           | 0.6666666870000029  | 0.3333333429999996  | 0.3321770548213422 |
|                    | Ti 4           | 0.6666666870000029  | 0.3333333429999996  | 0.8321770248213396 |
|                    | Ti 5           | 0.3333333429999996  | 0.6666666870000029  | 0.6655103988213453 |
|                    | Ti 6           | 0.3333333429999996  | 0.6666666870000029  | 0.1655103838213406 |
| <b>TiO2</b>        |                |                     |                     |                    |
|                    | <b>Element</b> | <b>Coordinates</b>  |                     |                    |
|                    |                | <b>X</b>            | <b>Y</b>            | <b>Z</b>           |
| a = 3.82060        | Ti 1           | -0.0000000000000000 | 0.0000000000000000  | 0.0000000000000000 |
| b = 3.82060        | Ti 2           | 0.5000000000000000  | 0.5000000000000000  | 0.5000000000000000 |
| c = 9.69652        | Ti 3           | 0.0000000000000000  | 0.5000000000000000  | 0.2500000000000000 |
| $\alpha$ = 90.0000 | Ti 4           | 0.5000000000000000  | -0.0000000000000000 | 0.7500000000000000 |
| $\beta$ = 90.0000  | O 1            | -0.0000000000000000 | 0.0000000000000000  | 0.2066838593974745 |
| $\gamma$ = 90.0000 | O 2            | 0.5000000000000000  | 0.5000000000000000  | 0.7066838893974697 |
|                    | O 3            | -0.0000000000000000 | 0.5000000000000000  | 0.4566838593974745 |
|                    | O 4            | 0.5000000000000000  | 0.0000000000000000  | 0.9566838893974697 |
|                    | O 5            | 0.5000000000000000  | -0.0000000000000000 | 0.5433161106025303 |
|                    | O 6            | 0.0000000000000000  | 0.5000000000000000  | 0.0433161406025255 |
|                    | O 7            | 0.5000000000000000  | 0.5000000000000000  | 0.2933161406025255 |
|                    | O 8            | 0.0000000000000000  | -0.0000000000000000 | 0.7933161106025303 |

Table S2. Bader's charge analysis of the Methylene Blue molecule.

| Atom | MB     |        |         |            | MB Absorbed on ZnTiO <sub>3</sub> |         |         |            | MB Absorbed on TiO <sub>2</sub> |        |         |            |
|------|--------|--------|---------|------------|-----------------------------------|---------|---------|------------|---------------------------------|--------|---------|------------|
|      | X      | Y      | Z       | Charge(-e) | X                                 | Y       | Z       | Charge(-e) | X                               | Y      | Z       | Charge(-e) |
| Cl   | 6.6723 | 5.4913 | 18.1256 | 3.9473     | 5.7841                            | 6.8665  | 18.8427 | 4.0377     | 8.5502                          | 6.3036 | 37.8262 | 4.0165     |
| C    | 6.6883 | 6.9248 | 18.2492 | 2.9801     | 5.4537                            | 8.2487  | 19.0343 | 2.9038     | 7.1274                          | 6.1282 | 37.9076 | 2.9116     |
| C    | 6.8113 | 7.7022 | 17.0778 | 3.7228     | 5.5389                            | 9.1145  | 17.9135 | 3.8886     | 6.3672                          | 5.9423 | 36.7213 | 3.9439     |
| C    | 6.8381 | 4.9031 | 16.9023 | 4.0263     | 6.1899                            | 6.4038  | 17.6162 | 4.0043     | 9.0968                          | 6.2958 | 36.5683 | 3.9895     |
| C    | 6.9903 | 7.1050 | 15.8404 | 4.4306     | 5.9565                            | 8.6387  | 16.6753 | 4.2272     | 6.9541                          | 5.9232 | 35.4362 | 4.1712     |
| C    | 7.0214 | 5.6667 | 15.7039 | 2.6235     | 6.3054                            | 7.2586  | 16.4816 | 2.6376     | 8.4054                          | 6.0825 | 35.3271 | 2.6542     |
| C    | 7.4012 | 7.0194 | 13.1881 | 4.2267     | 6.6400                            | 8.8226  | 14.0368 | 4.2430     | 7.1262                          | 5.6325 | 32.7208 | 4.1458     |
| C    | 7.6017 | 7.5508 | 11.9115 | 3.9548     | 6.8412                            | 9.4525  | 12.8237 | 3.9190     | 6.6611                          | 5.3793 | 31.4157 | 4.0569     |
| C    | 7.7943 | 6.7163 | 10.7922 | 2.9653     | 7.3367                            | 8.7318  | 11.6975 | 2.7809     | 7.5400                          | 5.2562 | 30.3197 | 2.9217     |
| C    | 7.7791 | 5.2961 | 10.9951 | 3.9989     | 7.6129                            | 7.3252  | 11.8614 | 4.102      | 8.9224                          | 5.3489 | 30.5791 | 3.9441     |
| C    | 7.5841 | 4.7715 | 12.2459 | 3.9766     | 7.3997                            | 6.7069  | 13.0583 | 3.8457     | 9.4304                          | 5.5405 | 31.8646 | 4.0569     |
| C    | 7.3901 | 5.5967 | 13.3925 | 2.632      | 6.9072                            | 7.4076  | 14.2087 | 2.5409     | 8.5204                          | 5.7274 | 32.9874 | 2.6496     |
| C    | 8.0476 | 8.6800 | 9.3573  | 3.3209     | 7.2135                            | 10.7579 | 10.3305 | 3.3619     | 5.9685                          | 4.1045 | 28.7949 | 3.2969     |
| C    | 8.1623 | 6.3644 | 8.3904  | 3.2358     | 8.1032                            | 8.6179  | 9.3682  | 3.4622     | 7.6270                          | 5.7136 | 27.888  | 3.4016     |
| C    | 6.3617 | 6.7509 | 20.6746 | 3.2311     | 5.0669                            | 7.8474  | 21.4312 | 3.3437     | 7.3591                          | 6.2087 | 40.3865 | 3.3551     |
| C    | 6.6204 | 8.9880 | 19.5700 | 3.3401     | 4.6740                            | 10.1103 | 20.4200 | 3.2829     | 5.0623                          | 5.8367 | 39.2665 | 3.7745     |
| C    | 7.1937 | 8.1669 | 14.4764 | 5.6016     | 6.0469                            | 9.7703  | 15.3638 | 5.7591     | 5.9774                          | 5.7813 | 34.0176 | 5.7675     |

---

|   |        |         |         |        |        |         |         |        |         |        |         |        |
|---|--------|---------|---------|--------|--------|---------|---------|--------|---------|--------|---------|--------|
| S | 7.2001 | 4.9769  | 14.5721 | 7.7963 | 6.7432 | 6.7090  | 15.3311 | 7.8003 | 9.1383  | 5.9281 | 34.1814 | 7.7280 |
| N | 7.9923 | 7.2378  | 9.5422  | 7.4915 | 7.5403 | 9.3424  | 10.5148 | 7.4025 | 7.1210  | 4.9650 | 29.0625 | 7.4757 |
| N | 6.6024 | 7.5282  | 19.4673 | 7.4619 | 5.0720 | 8.7171  | 20.2557 | 7.4840 | 6.5601  | 6.1084 | 39.1715 | 7.0200 |
| N | 7.8071 | 10.6069 | 16.2128 | 7.7365 | 7.4174 | 9.9721  | 25.4704 | 7.6694 | 11.3226 | 6.5800 | 40.5672 | 7.5771 |
| H | 6.5464 | 4.8632  | 19.0063 | 0.9519 | 5.7058 | 6.1701  | 19.6745 | 0.9410 | 9.2393  | 6.4583 | 38.7013 | 0.8427 |
| H | 6.8463 | 3.8182  | 16.793  | 0.9123 | 6.4397 | 5.3533  | 17.4678 | 0.9051 | 10.2034 | 6.3392 | 36.4626 | 0.9552 |
| H | 6.8474 | 8.8004  | 17.1014 | 0.8673 | 5.2899 | 10.1698 | 18.0158 | 0.9714 | 5.2548  | 5.9168 | 36.7093 | 0.9938 |
| H | 7.6063 | 8.6347  | 11.8008 | 0.9618 | 6.6248 | 10.5151 | 12.7307 | 0.9768 | 5.5971  | 5.3471 | 31.2078 | 0.9224 |
| H | 7.9277 | 4.6224  | 10.1538 | 0.9834 | 7.9801 | 6.7477  | 11.0159 | 0.9303 | 9.6273  | 5.1718 | 29.7369 | 0.9330 |
| H | 7.5780 | 3.6933  | 12.4092 | 0.9595 | 7.5939 | 5.6415  | 13.1844 | 0.9355 | 10.4563 | 5.5461 | 32.1510 | 0.8849 |
| H | 8.2348 | 8.9005  | 8.3018  | 0.9762 | 7.3761 | 11.0287 | 9.28130 | 0.8688 | 6.2252  | 3.2788 | 28.0652 | 0.9363 |
| H | 7.0996 | 9.1625  | 9.6475  | 0.9452 | 6.1601 | 10.9473 | 10.5846 | 0.9927 | 5.6256  | 3.6424 | 29.726  | 0.9630 |
| H | 8.8571 | 9.1316  | 9.9535  | 0.9439 | 7.8548 | 11.3926 | 10.9641 | 0.9680 | 5.0539  | 4.6016 | 28.4023 | 0.9802 |
| H | 9.0590 | 5.7301  | 8.4852  | 0.9984 | 9.0775 | 8.1775  | 9.6186  | 0.9366 | 8.3192  | 6.4883 | 28.2325 | 0.9457 |
| H | 7.2886 | 5.7092  | 8.2442  | 0.9748 | 7.4344 | 7.8141  | 9.0297  | 0.9029 | 8.1160  | 4.9767 | 27.2684 | 0.9655 |
| H | 8.2768 | 6.9802  | 7.4928  | 0.9921 | 8.2389 | 9.3251  | 8.5457  | 0.9121 | 6.7832  | 6.1443 | 27.3016 | 0.9375 |
| H | 7.1440 | 5.9919  | 20.827  | 0.9953 | 6.0342 | 7.3406  | 21.5525 | 0.9403 | 7.8858  | 7.2124 | 40.3901 | 0.9220 |
| H | 6.3730 | 7.4256  | 21.5362 | 0.9362 | 4.8969 | 8.4559  | 22.3239 | 0.9438 | 6.7805  | 6.1236 | 41.3176 | 0.9454 |

---
